# Supplementary material for: Stable organic lead iodides with three-dimensional crystallographic and electronic structures showing high photoresponse
Source: Royal Society of Chemistry journal article supplement (doi:10.1039/d2qi01651f), 2022-01-01
Supplement: d2qi01651f1.pdf [file d2qi01651f1.pdf]

## Electronic Supplementary Information

# **Stable organic lead iodides with three-dimensional crystallographic and electronic structures showing high photoresponse**

Chang-Chun Fan<sup>a</sup>, Bei-Dou Liang<sup>a</sup>, Cheng-Dong Liu<sup>a</sup>, Chao-Yang Chai<sup>a</sup>, Xiang-Bin Han<sup>a\*</sup>, Wen Zhang<sup>a\*</sup>

<sup>a</sup>Jiangsu Key Laboratory for Science and Applications of Molecular Ferroelectrics and School of Chemistry and Chemical Engineering, Southeast University, Nanjing 211189, China

## Experimental

**Fig. S1.** PXRD patterns.

**Fig. S2.** The bandgap is deduced from the Tauc equation.

**Fig. S3.** Semiconducting properties of (Mpda)Pb<sub>2</sub>I<sub>6</sub>.

**Fig. S4.** Edge-sharing “Step-like” connection in the (110) direction.

**Fig. S5.** Structural properties (M<sub>2</sub>da)Pb<sub>2</sub>I<sub>6</sub>.

**Fig. S6** Structural property in (Mpda)Pb<sub>2</sub>I<sub>6</sub>.

**Fig. S7.** (a) Cation and (b-d) N–H···halogen and C–H···halogen interactions between the organic cations and inorganic layers of (M<sub>2</sub>pda)Pb<sub>2</sub>I<sub>6</sub> at 100 K.

**Fig. S8.** (a) Hirshfeld surface and (b-d) 2D fingerprint plots of (M<sub>2</sub>pda)Pb<sub>2</sub>I<sub>6</sub> at 100 K.

**Fig. S9.** Difference of bond angle below (a) and above (b) the phase transition of (M<sub>2</sub>pda)Pb<sub>2</sub>I<sub>6</sub>.

**Fig. S10.** Structural distortions of the inorganic sublattice in (M<sub>2</sub>pda)Pb<sub>2</sub>I<sub>6</sub> at 100 K (a and b) and 298 K (c and d).

**Fig. S11.** Dielectric transition of (H<sub>2</sub>bda)Pb<sub>2</sub>I<sub>6</sub> at different frequencies.

**Fig. S12.** (a) Hirshfeld surface and (b-d) 2D fingerprint plots of (H<sub>2</sub>bda)Pb<sub>2</sub>I<sub>6</sub> at 100 K.

**Fig. S13.** Photographs of crystal at 298 K and 40% relative humidity at t = 0 hours (left), t = 14 hours (middle) and t = 20 hours (right).

**Fig. S14.** Possible decomposition pathway of lead halide perovskites in the presence of water.

**Fig. S15.** Steady-state photocurrent under 120 mW/cm<sup>2</sup> sunlight illumination.

**Table S1.** Crystallographic data and refinement parameters for  $(M_2pda)Pb_2I_6$ ,  $(Mpda)Pb_2I_6$  and  $(H_2bda)Pb_2I_6$ .

**Table S2.** Selected hydrogen bonds for  $(M_2pda)Pb_2I_6$  (100 K) and  $(H_2bda)Pb_2I_6$  (298 K).

**Table S3.** Bond angles and bond lengths of  $(M_2pda)Pb_2I_6$ ,  $(Mpda)Pb_2I_6$  and  $(H_2bda)Pb_2I_6$ .

**Table S4.** Survey of intra-octahedral distortions in  $(M_2pda)Pb_2I_6$ .

**Table S5.** Structure optimization for DFT calculation.

## Experimental

**Materials and general characterizations.** All reagents were commercially available and used as received without further purification. Powder X-ray diffraction (PXRD) patterns were obtained on a Rigaku SmartLab X-ray diffraction instrument. Differential scanning calorimetry measurement was carried out on a TA Instrument SDT-Q10 at a scanning rate of 10 K min<sup>-1</sup> under nitrogen. Thermogravimetric analysis (TGA) was performed by a NETZSCH TG209 F3 system. Temperature-dependent dielectric constant spectra were measured on powdered and single-crystal samples by using a Tonghui TH2828A impedance analyzer at frequencies of 1–1000 kHz with an applied electric field of 1 V. Ultraviolet-vis (UV-vis) absorption spectra were measured with Shimadzu UV-2600 equipped with ISR-2600Plus integrating sphere.

**Synthesis of the titled compound.** Pb(AcO)<sub>2</sub> (15 mmol) was dissolved in HI solution (60 mL) at 130 °C, followed by addition of 1 mL of 50% H<sub>3</sub>PO<sub>2</sub> solution and M<sub>2</sub>pda (5 mmol). Yellow precipitates appeared and then were dissolved by stirring. The resulting solution was evaporated at 60 °C. Millimeter-sized red block-shaped crystals were obtained with a yield of about 80%. Phase purity for batches of crystalline samples was confirmed by PXRD (Fig. S1). Other titled compounds are the same.

**Synthesis of MAPbI<sub>3</sub>.** Pb(AcO)<sub>2</sub> (12.6 mmol) and MAI (12.6 mmol) were dissolved in HI solution (40 mL) at 60 °C, followed by addition of 1 mL of 50% H<sub>3</sub>PO<sub>2</sub> solution. The resulting yellow solution was evaporated at 60 °C. Black block-shaped crystals were obtained.

**Synthesis of MAPbI<sub>3</sub>.** Pb(AcO)<sub>2</sub> (12.6 mmol) and MAI (12.6 mmol) were dissolved in gamma-butyrolactone (40 mL) at 60 °C. The resulting yellow solution was evaporated at 60 °C. Millimeter-sized black block-shaped crystals were obtained.

**Single-crystal X-ray Diffraction.** Crystallographic data were collected on a Rigaku Oxford Diffraction Supernova Dual Source, Cu at Zero equipped with an AtlasS2 CCD using Mo K $\alpha$  radiation. CrysAlisPro 1.171.40.84a (Rigaku OD, 2020) was used to collect data, refine cells, and reduce data. SHELXL-2018 package was used to solve the structures by direct methods. All non-hydrogen atoms were refined anisotropically. The details of crystal data are given in Tables S1 and S2. CCDC 2183780-2183783 contain the crystallographic data for (M<sub>2</sub>pda)Pb<sub>2</sub>I<sub>6</sub>, (Mpda)Pb<sub>2</sub>I<sub>6</sub>, and (H<sub>2</sub>pda)Pb<sub>2</sub>I<sub>6</sub>. These data can be

obtained free of charge via <http://www.ccdc.cam.ac.uk/conts/retrieving.html>, or from the Cambridge Crystallographic Data Centre, 12 Union Road, Cambridge CB2 1EZ, UK; fax: +44 1223-336-033; or e-mail: [deposit@ccdc.cam.ac.uk](mailto:deposit@ccdc.cam.ac.uk).

***I-V* measurement.** Simulated AM 1.5 G irradiation was produced by a CEL-S500/350 solar simulator (Ceaulight, 350 W) with an AM1.5 filter. The light intensity was measured and calibrated by a Si photodetector connected with a power meter (CEL-NP2000-2A, Ceaulight). *I-V* measurements were performed by a PDA FS380 Source meter under AM 1.5 G illumination.

**Theoretical calculations.** DFT calculations were conducted by using the Vienna ab initio simulation package.<sup>1</sup> The projector augmented wave method was adopted to define the ion-electron interactions.<sup>2</sup> The exchange-correlation interaction was expressed by the Perdew–Burke–Ernzerhof (PBE) functional within the generalized gradient approximation.<sup>3</sup> Grimme’s dispersion-corrected semi-empirical DFT-D3 method was employed to evaluate van der Waals interactions, affording optimized lattice parameters comparable to the experimental results (Table S5).<sup>4</sup> The energy cutoff was set to 500 eV and a 4×2×5 Monkhorst-Pack grid of k-points was used.<sup>5</sup> VASPKIT was employed to perform post-processing analysis.<sup>6</sup>

## References

1. Kresse, G.; Furthmüller, J. Efficient iterative schemes for ab initio total-energy calculations using a plane-wave basis set. *Phys. Rev. B.* **1996**, 54, 11169-11186.
2. Blöchl, P. E.; Projector augmented-wave method. *Phys. Rev. B.* **1994**, 50, 17953-17979.
3. Perdew, J. P.; Burke, K.; Ernzerhof, M. Generalized gradient approximation made simple. *Phys. Rev. Lett.* **1996**, 77, 3865-3868.
4. Grimme, S.; Antony, J.; Ehrlich, S.; Krieg, H. *J. Chem. Phys.* **2010**, 132, 154104.
5. Monkhorst, H. J.; Pack, J. D. Special points for Brillouin-zone integrations. *Phys. Rev. B.* **1976**, 13, 5188-5192.
6. Wang, V.; Xu, N.; Liu, J. C.; Tang, G.; Geng, W. T. VASPKIT: A user-friendly interface facilitating high-throughput computing and analysis using VASP code. *Comput. Phys. Commun.* **2021**, 267, 108033.

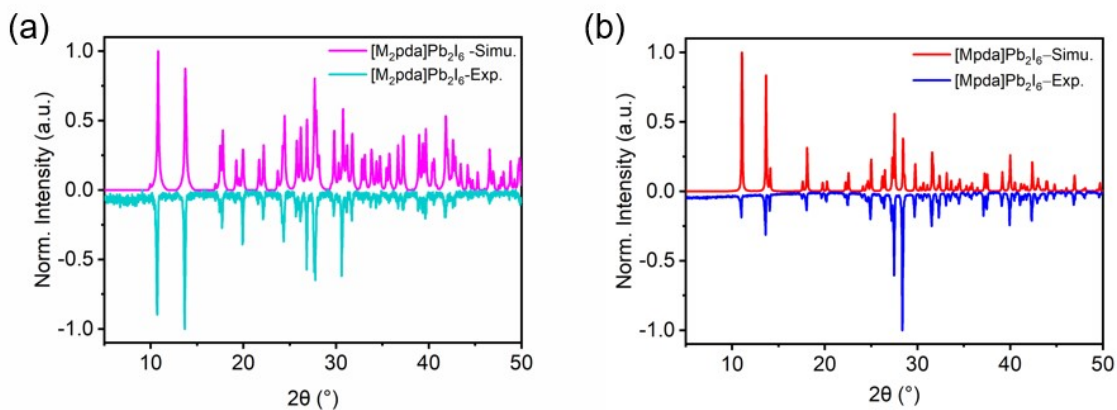

**Fig. S1.** PXRD patterns of (a)  $(M_2pda)Pb_2I_6$ ; (b)  $(Mpda)Pb_2I_6$ .

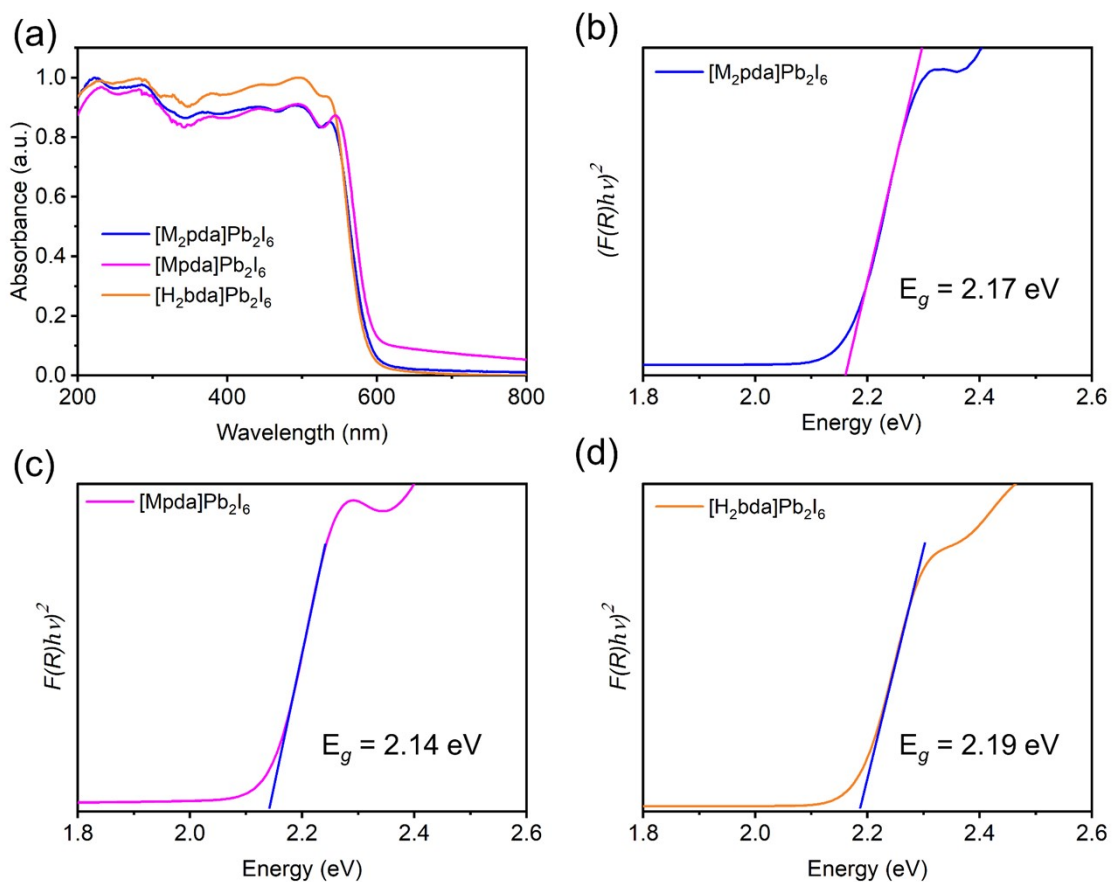

**Fig. S2.** (a) UV-vis absorption spectrum of  $(M_2pda)Pb_2I_6$ ,  $(Mpda)Pb_2I_6$ , and  $(H_2pda)Pb_2I_6$ . (b-d) The bandgap is deduced from the Tauc equation.

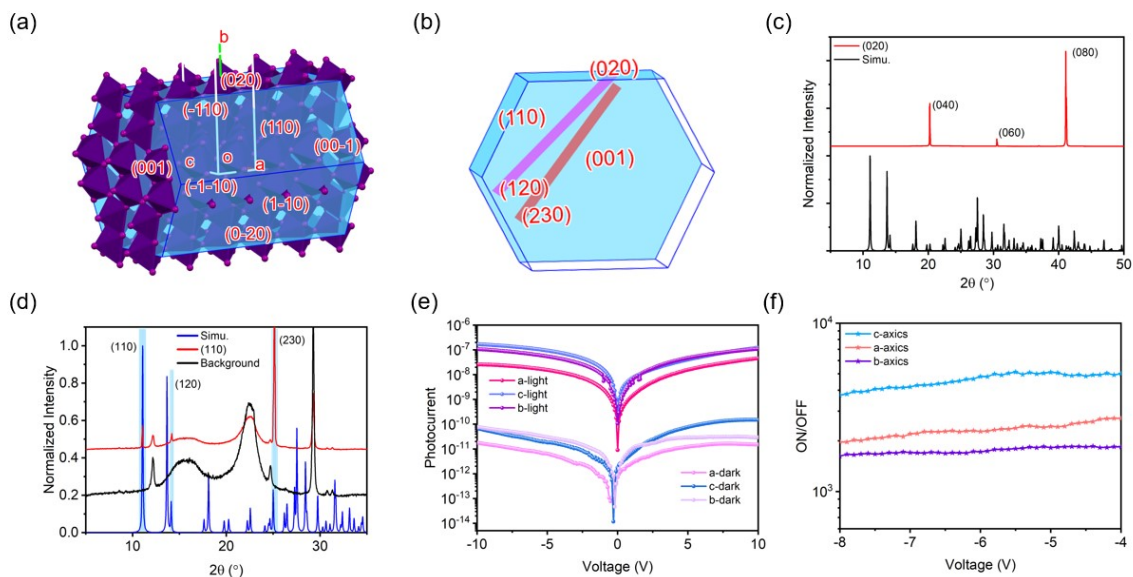

**Fig. S3.** Semiconducting properties of  $(\text{MpdA})\text{Pb}_2\text{I}_6$ . (a, b) The calculated crystal morphology in Mercury; (c, d) PXR D patterns of a single crystal recorded from the (020) plane and (110); (e, f) Isotropic photoresponse measured along different axis directions.

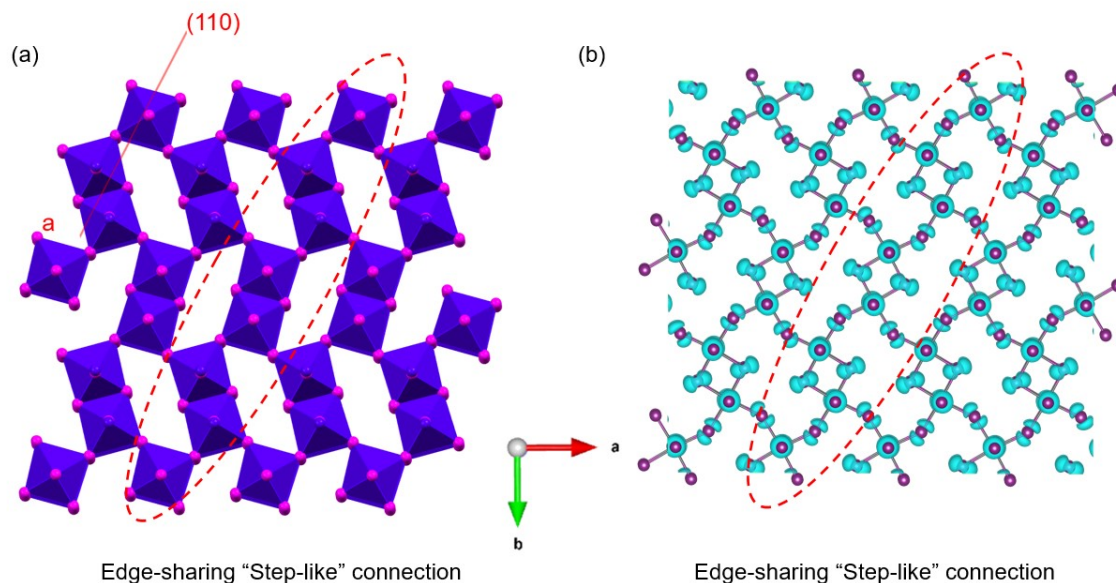

**Fig. S4.** Edge-sharing "Step-like" connection in the (110) direction. (a) The inorganic framework edge-sharing "step-like" connection in the (110) direction. (b) Isosurface plots of charge density corresponding to CBM at the Z point in the (110) direction.

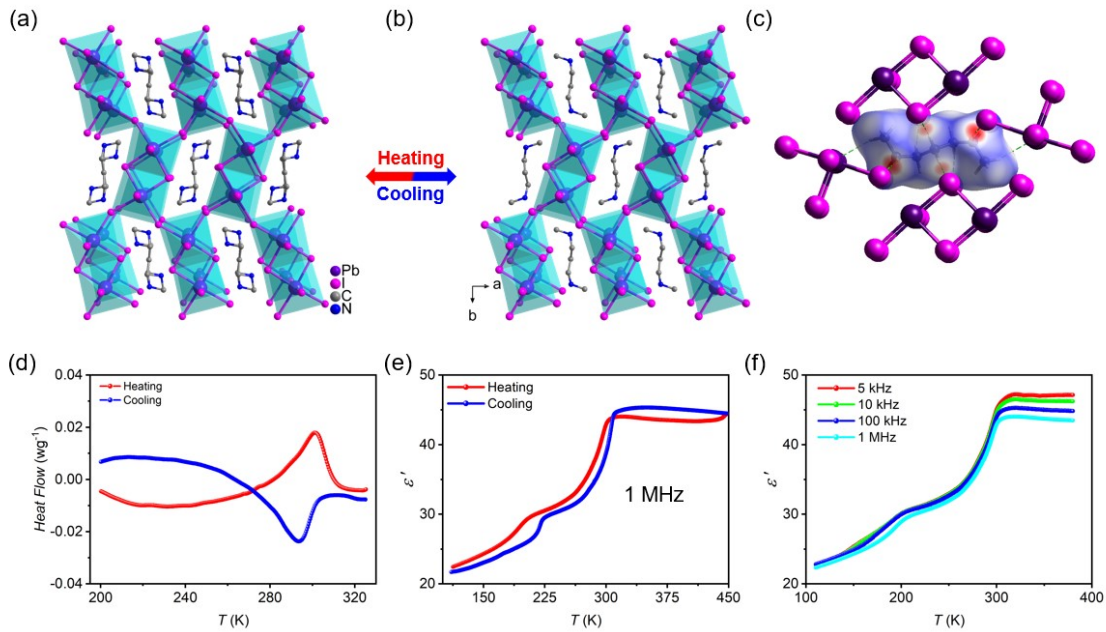

**Fig. S5.** Structural properties of  $(M_2pda)Pb_2I_6$ : (a, b) Disorder and order states of  $(M_2pda)^{2+}$  cations at 298 and 100 K. Disordered atoms and H atoms are omitted for clarity; (c) Hirshfeld surface at 100 K; (d) DSC curves; (e) Dielectric transition; (f) Dielectric transition at different frequencies.

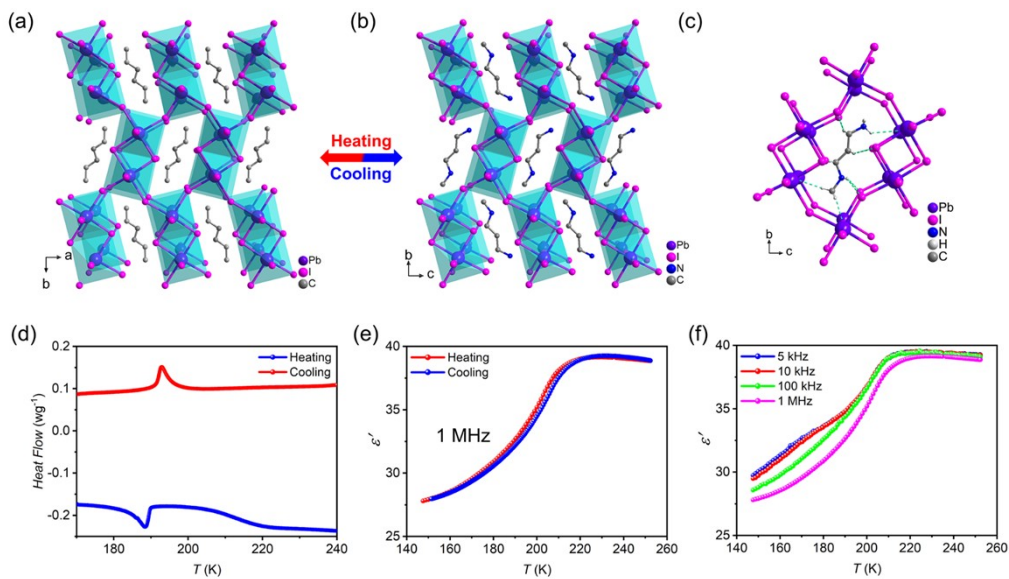

**Fig. S6.** Structural properties in  $(Mpda)Pb_2I_6$ : (a, b) Disorder and order state of cations of  $(Mpda)^{2+}$  at 298 and 100 K. Disordered atoms and H atoms are omitted for clarity; (c) 3D dnorm surface of  $(M_2pda)Pb_2I_6$  at 100 K; (d) DSC curves; (e) Dielectric transition; (f) Dielectric transition at different frequencies.



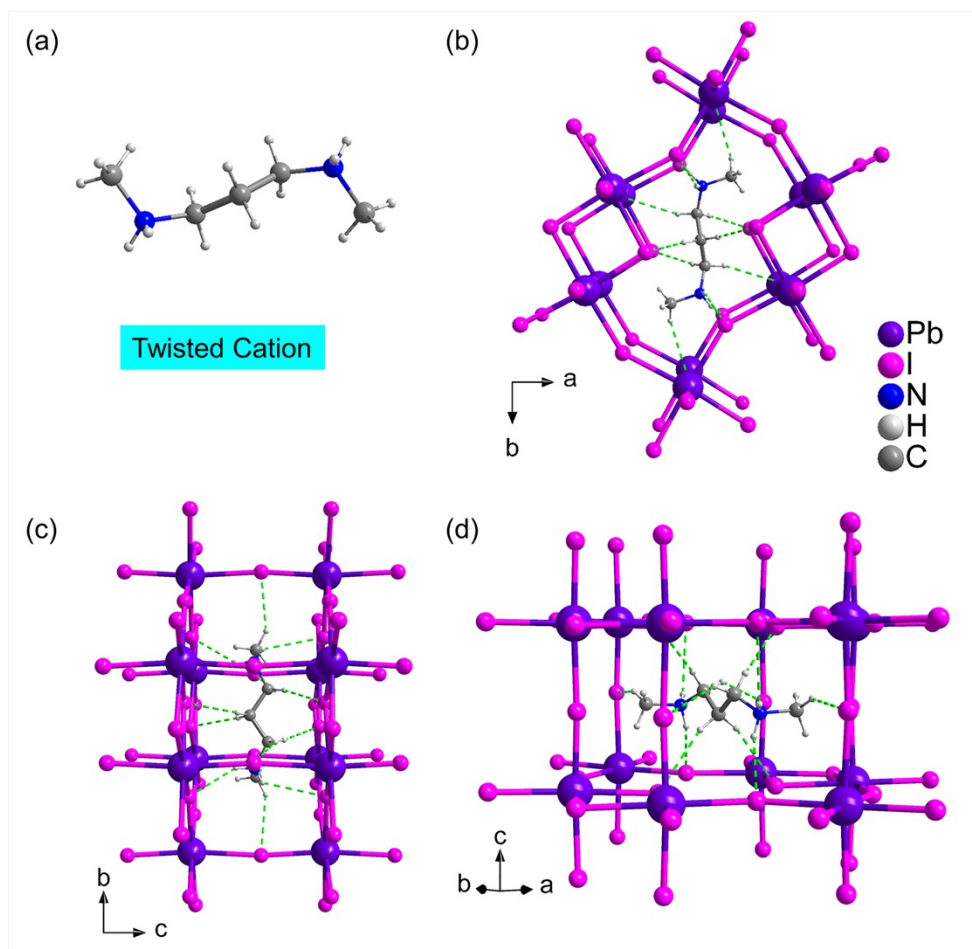

**Fig. S7.** (a) twisted cation; (b-d) N–H···halogen and C–H···halogen interactions between the organic cations and inorganic layers of  $(M_2pda)Pb_2I_6$  at 100 K.

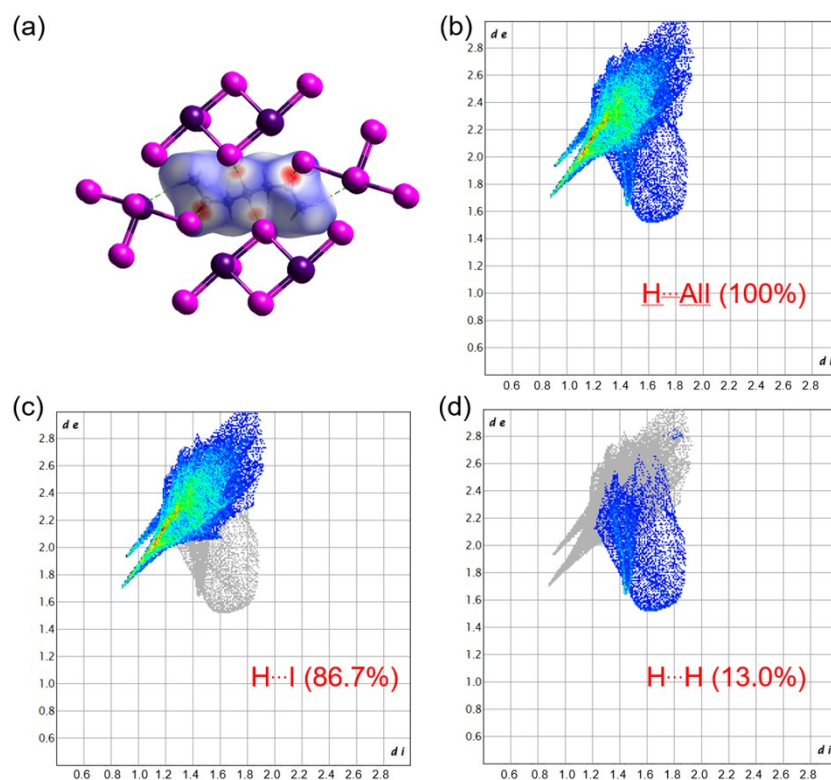

**Fig. S8.** (a) Hirshfeld surface and (b-d) 2D fingerprint plots of  $(M_2pda)Pb_2I_6$  at 100 K. Red, white and blue regions of the Hirshfeld surfaces indicate positive (close contact), neutral and negative isoenergies, respectively. In the plot, the  $d_i$  and  $d_e$  denote the distances from the surface to the nearest atom interior and exterior to the surface, respectively.

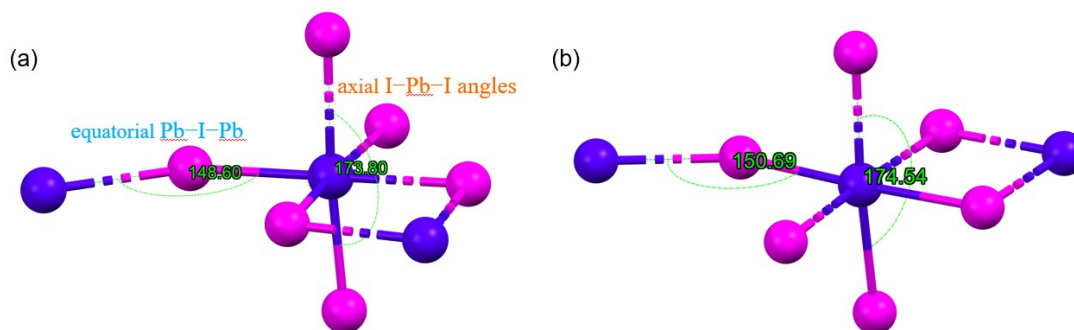

**Fig. S9.** The difference of bond angles before (a, LTP) and after (b, HTP) the phase transition of  $(M_2pda)Pb_2I_6$ .

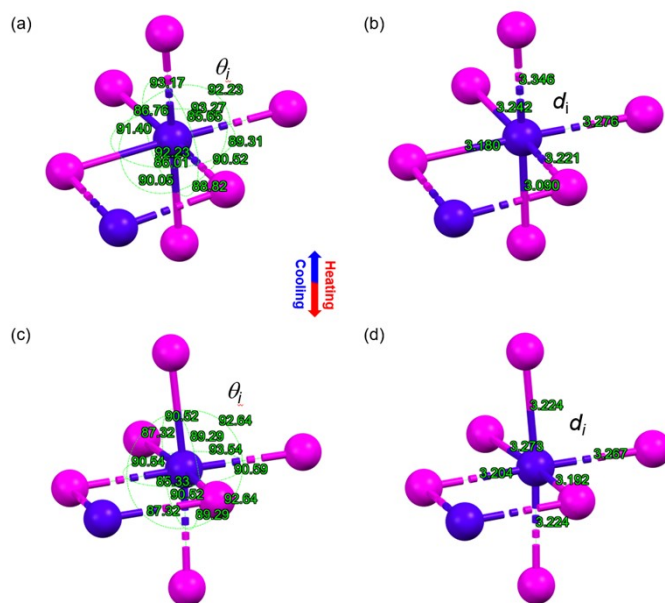

**Fig. S10.** Structural distortions of the inorganic sublattice in  $(M_2pda)Pb_2I_6$  at 100 K (a, b) and 298 K (c, d), (a, c) I–Pb–I bond angles ( $\theta_i$ ), and (b, d) Pb–I bond lengths ( $d_i$ ).

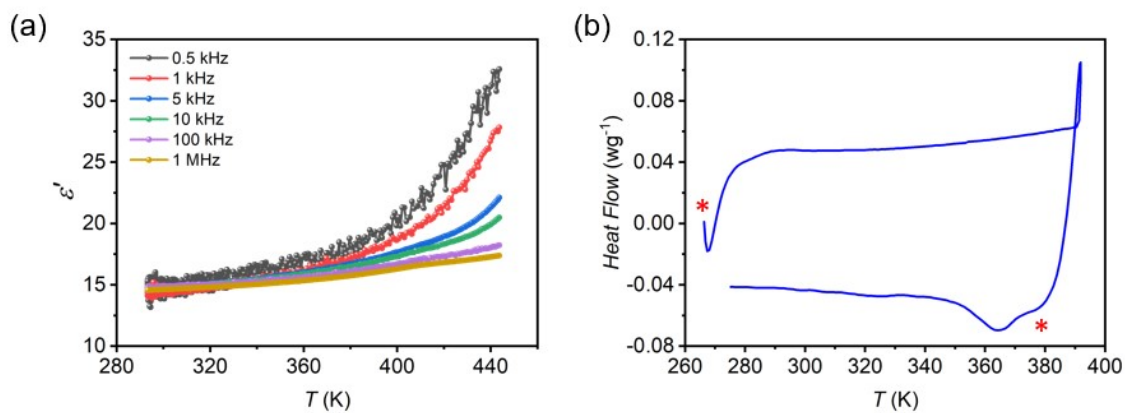

**Fig. S11.** (a) Dielectric transition of  $(H_2bda)Pb_2I_6$  at different frequencies; (b) DSC curve of  $(H_2bda)Pb_2I_6$  (\* represents the start-up signals instead of the signal from samples). Dielectric and DSC experiments show that  $(H_2pda)Pb_2I_6$  does not undergo structural phase transition below 400 K.

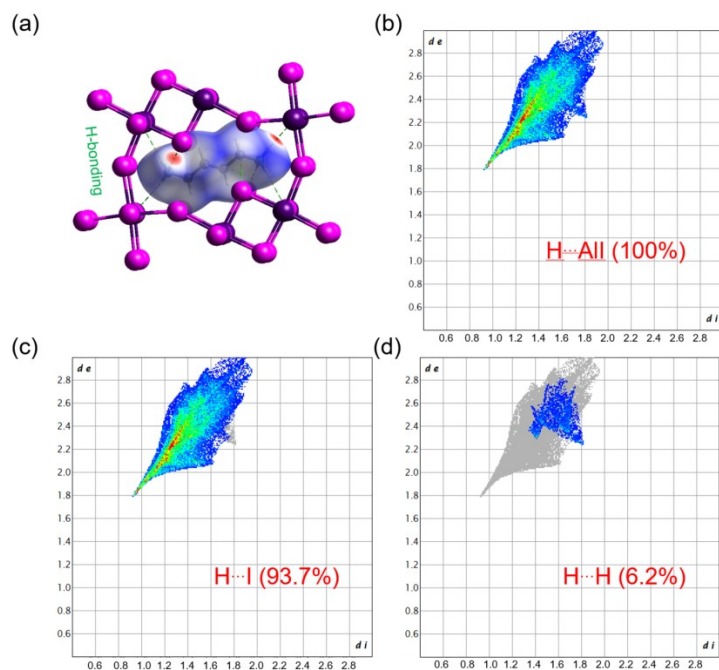

**Fig. S12.** (a) Hirshfeld surface and (b-d) 2D fingerprint plots of (H<sub>2</sub>bda)Pb<sub>2</sub>I<sub>6</sub> at 298 K. Red, white and blue regions of the Hirshfeld surfaces indicate positive (close contact), neutral and negative isoenergies, respectively. In the plot, the  $d_i$  and  $d_e$  denote the distances from the surface to the nearest atom interior and exterior to the surface, respectively.

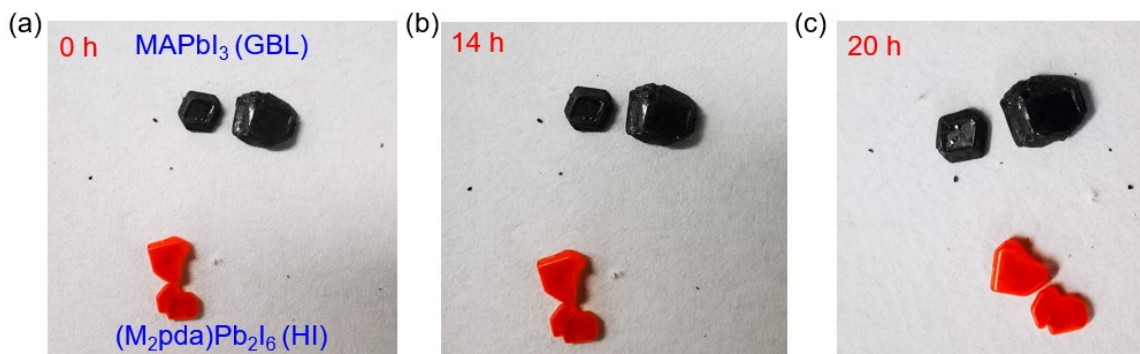

**Fig. S13.** Photographs of crystal at 298 K and 40% relative humidity at  $t = 0$  hours (left),  $t = 14$  hours (middle) and  $t = 20$  hours (right).

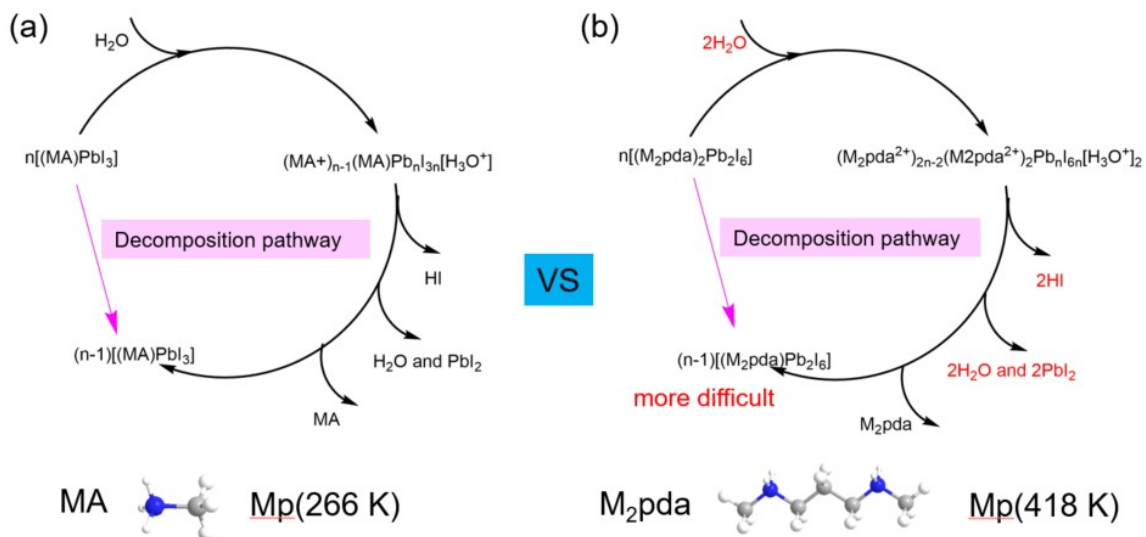

**Fig. S14.** Possible decomposition pathway of lead halide perovskites in the presence of water: (a) Decomposition pathway of MAPbI<sub>3</sub>; (b) Decomposition pathway of (M<sub>2</sub>pda)Pb<sub>2</sub>I<sub>6</sub>.

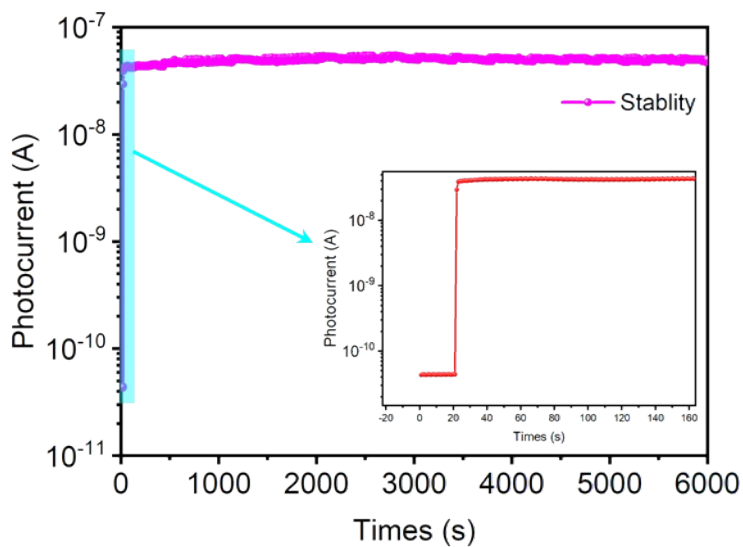

**Fig. S15.** Steady-state photocurrent under 120 mW/cm<sup>2</sup> sunlight illumination.

**Table S1.** Crystallographic data and refinement parameters for (M<sub>2</sub>pda)Pb<sub>2</sub>I<sub>6</sub>, (Mpda)Pb<sub>2</sub>I<sub>6</sub>, and (H<sub>2</sub>bda)Pb<sub>2</sub>I<sub>6</sub>.

|                                                                                                       | [M <sub>2</sub> pda]Pb <sub>2</sub> I <sub>6</sub>                           |                                                                              | [Mpda]Pb <sub>2</sub> I <sub>6</sub>                                         | [H <sub>2</sub> bda]Pb <sub>2</sub> I <sub>6</sub>                           |
|-------------------------------------------------------------------------------------------------------|------------------------------------------------------------------------------|------------------------------------------------------------------------------|------------------------------------------------------------------------------|------------------------------------------------------------------------------|
|                                                                                                       | 100 K                                                                        | 298 K                                                                        | 298K                                                                         | 298K                                                                         |
| Formula                                                                                               | C <sub>5</sub> H <sub>16</sub> N <sub>2</sub> Pb <sub>2</sub> I <sub>6</sub> | C <sub>5</sub> H <sub>16</sub> N <sub>2</sub> Pb <sub>2</sub> I <sub>6</sub> | C <sub>4</sub> H <sub>14</sub> N <sub>2</sub> Pb <sub>2</sub> I <sub>6</sub> | C <sub>4</sub> H <sub>14</sub> N <sub>2</sub> Pb <sub>2</sub> I <sub>6</sub> |
| Formula weight                                                                                        | 1279.98                                                                      | 1279.98                                                                      | 1265.95                                                                      | 1265.95                                                                      |
| Crystal system                                                                                        | Orthorhombic                                                                 | Orthorhombic                                                                 | Orthorhombic                                                                 | Monoclinic                                                                   |
| space group                                                                                           | <i>P2<sub>1</sub>2<sub>1</sub>2</i>                                          | <i>Pbam</i>                                                                  | <i>Pbam</i>                                                                  | <i>P2<sub>1</sub>/c</i>                                                      |
| <i>a</i> / Å                                                                                          | 9.1348(10)                                                                   | 9.2222(5)                                                                    | 8.9733(9)                                                                    | 6.5066(5)                                                                    |
| <i>b</i> / Å                                                                                          | 17.6663(19)                                                                  | 17.7717 (7)                                                                  | 17.5285 (11)                                                                 | 17.0103(14)                                                                  |
| <i>c</i> / Å                                                                                          | 6.4266(10)                                                                   | 6.4398(3)                                                                    | 6.4748(6)                                                                    | 9.2072(7)                                                                    |
| $\alpha$ / °                                                                                          | 90                                                                           | 90                                                                           | 90                                                                           | 90                                                                           |
| $\beta$ / °                                                                                           | 90                                                                           | 90                                                                           | 90                                                                           | 92.815(7)                                                                    |
| $\gamma$ / °                                                                                          | 90                                                                           | 90                                                                           | 90                                                                           | 90                                                                           |
| <i>V</i> / Å <sup>3</sup>                                                                             | 1037.1(2)                                                                    | 1055.45 (9)                                                                  | 1018.41 (14)                                                                 | 1017.82(14)                                                                  |
| <i>Z</i>                                                                                              | 2                                                                            | 2                                                                            | 2                                                                            | 2                                                                            |
| Flack parameter                                                                                       | 0.48(17)                                                                     | /                                                                            | /                                                                            | /                                                                            |
| <i>D</i> <sub>calc</sub> / g·cm <sup>-3</sup>                                                         | 4.099                                                                        | 4.017                                                                        | 4.082                                                                        | 4.131                                                                        |
| $\mu$ / mm <sup>-1</sup>                                                                              | 25.125                                                                       | 24.688                                                                       | 25.582                                                                       | 25.599                                                                       |
| total reflns                                                                                          | 2249                                                                         | 1395                                                                         | 1340                                                                         | 2504                                                                         |
| obsd reflns ( <i>I</i> > 2σ( <i>I</i> ))                                                              | 1964                                                                         | 1140                                                                         | 945                                                                          | 1678                                                                         |
| <i>R</i> <sub>int</sub>                                                                               | 0.031                                                                        | 0.040                                                                        | 0.035                                                                        | 0.0554                                                                       |
| <i>R</i> <sub>1</sub> <sup>a</sup> / <i>wR</i> <sub>2</sub> <sup>b</sup> ( <i>I</i> > 2σ( <i>I</i> )) | 0.0712, 0.1379                                                               | 0.0508, 0.1230                                                               | 0.0364, 0.0787                                                               | 0.0411, 0.0879                                                               |
| <i>R</i> <sup>1</sup> / <i>wR</i> <sup>2</sup> (all data)                                             | 0.0802, 0.1442                                                               | 0.0612, 0.1273                                                               | 0.0646, 0.0873                                                               | 0.0737, 0.0994                                                               |
| GOF                                                                                                   | 1.11                                                                         | 1.066                                                                        | 1.044                                                                        | 1.099                                                                        |
| $\Delta\rho^c$ / e·Å <sup>-3</sup>                                                                    | 6.42/−4.44                                                                   | 1.66/−3.35                                                                   | 1.29/−1.06                                                                   | 1.34/−2.28                                                                   |

<sup>a</sup>  $R_1 = \sum |F_o| - |F_c| / \sum |F_o|$ . <sup>b</sup>  $wR_2 = [\sum w(F_o^2 - F_c^2)^2] / \sum w(F_o^2)^2]^{1/2}$ . <sup>c</sup> Maximum and minimum residual electron density.

**Table S2.** Selected hydrogen bonds for (M<sub>2</sub>pda)Pb<sub>2</sub>I<sub>6</sub> (100 K) and (H<sub>2</sub>bda)Pb<sub>2</sub>I<sub>6</sub> (298 K).

| D–H···A                                                                                                                              | D–H / Å | H···A / Å | D···A / Å | ∠DHA / ° |
|--------------------------------------------------------------------------------------------------------------------------------------|---------|-----------|-----------|----------|
| (M <sub>2</sub> pda)Pb <sub>2</sub> I <sub>6</sub>                                                                                   |         |           |           |          |
| N(1)–H(1B)···I(3) <sup>i</sup>                                                                                                       | 0.91    | 3.10      | 3.77(5)   | 132.1    |
| N(1)–H(1A)···I(3) <sup>ii</sup>                                                                                                      | 0.91    | 2.65      | 3.46(5)   | 141.9    |
| Symmetry codes: (i) $x-1/2, -y+3/2, -z$ ; (ii) $x-1/2, -y+3/2, -z+1$ .                                                               |         |           |           |          |
| [H <sub>2</sub> bda]Pb <sub>2</sub> I <sub>6</sub>                                                                                   |         |           |           |          |
| N(1)–H(1E)···I(1) <sup>i</sup>                                                                                                       | 0.89    | 2.90      | 3.764(12) | 164.8    |
| N(1)–H(1D)···I(3) <sup>ii</sup>                                                                                                      | 0.89    | 2.84      | 3.687(14) | 160.1    |
| N(1)–H(1C)···I(3) <sup>iii</sup>                                                                                                     | 0.89    | 3.04      | 3.767(11) | 140.1    |
| C(2)–H(2B)···I(2) <sup>iv</sup>                                                                                                      | 0.97    | 3.26      | 4.024(14) | 137.3    |
| C(2)–H(2B)···I(1) <sup>v</sup>                                                                                                       | 0.97    | 3.14      | 3.811(15) | 127.9    |
| C(2)–H(2A)···I(2)                                                                                                                    | 0.97    | 3.30      | 3.939(15) | 125.1    |
| C(1)–H(1A)···I(1) <sup>i</sup>                                                                                                       | 0.97    | 3.17      | 3.805(11) | 124.7    |
| Symmetry codes: (i) $-x+1, -y+1, -z+1$ ; (ii) $x-1, -y+1/2, z-1/2$ ; (iii) $x-1, y, z-1$ ; (iv) $x-1, y, z$ ; (v) $-x, -y+1, -z+1$ . |         |           |           |          |

**Table S3.** Bond angles and bond lengths of (M<sub>2</sub>pda)Pb<sub>2</sub>I<sub>6</sub>, (Mpda)Pb<sub>2</sub>I<sub>6</sub>, and (H<sub>2</sub>bda)Pb<sub>2</sub>I<sub>6</sub>.

| Bond angles                                                                          | Angle / °  | Bond lengths              | Length / Å  |
|--------------------------------------------------------------------------------------|------------|---------------------------|-------------|
| <b>(M<sub>2</sub>pda)Pb<sub>2</sub>I<sub>6</sub>-100K</b>                            |            |                           |             |
| Pb(1)–I(1)–Pb(1) <sup>i</sup>                                                        | 93.89(6)   | Pb(1)–I(1)                | 3.180(2)    |
| Pb(1)–I(2)–Pb(1) <sup>iV</sup>                                                       | 173.80(10) | Pb(1)–I(2) <sup>i</sup>   | 3.221(2)    |
| Pb(1)–I(3)–Pb(1) <sup>V</sup>                                                        | 148.62(8)  | Pb(1)–I(2)                | 3.346(3)    |
| I(2)– Pb(1)–I(1)                                                                     | 90.07(7)   | Pb(1)–I(2) <sup>ii</sup>  | 3.090(3)    |
| I(2)– Pb(1)–I(1) <sup>i</sup>                                                        | 88.84(8)   | Pb(1)–I(3)                | 3.242(2)    |
| I(1)– Pb(1)–I(1) <sup>i</sup>                                                        | 86.00(7)   | Pb(1)–I(3) <sup>iii</sup> | 3.275(2)    |
| I(2)– Pb(1)–I(3)                                                                     | 92.20(9)   |                           |             |
| I(1)– Pb(1)–I(3)                                                                     | 91.39(6)   |                           |             |
| I(1) <sup>i</sup> – Pb(1)–I(3)                                                       | 177.20(7)  |                           |             |
| I(2)– Pb(1)–I(3) <sup>ii</sup>                                                       | 90.54(8)   |                           |             |
| I(1)– Pb(1)–I(3) <sup>ii</sup>                                                       | 175.27(6)  |                           |             |
| I(1) <sup>i</sup> – Pb(1)–I(3) <sup>ii</sup>                                         | 89.32(6)   |                           |             |
| I(3)– Pb(1)–I(3) <sup>ii</sup>                                                       | 93.27(4)   |                           |             |
| I(2)– Pb(1)–I(2) <sup>iii</sup>                                                      | 173.80(10) |                           |             |
| I(1)– Pb(1)–I(2) <sup>iii</sup>                                                      | 86.73(7)   |                           |             |
| I(1) <sup>i</sup> – Pb(1)–I(2) <sup>ii</sup>                                         | 85.64(7)   |                           |             |
| I(3)– Pb(1)–I(2) <sup>iii</sup>                                                      | 93.19(8)   |                           |             |
| I(3) <sup>ii</sup> – Pb(1)–I(2) <sup>iii</sup>                                       | 92.22(8)   |                           |             |
| Symmetry codes:(i): 1+x, +y, 1+Z; (ii) 1–x, 1/2+y, 1–Z; (iii) 1–x, –1/2+y, 1–z; (iv) |            |                           |             |
| –1+x, +y, –1+z.                                                                      |            |                           |             |
| <b>(M<sub>2</sub>pda)Pb<sub>2</sub>I<sub>6</sub>-298K</b>                            |            |                           |             |
| Pb(1)–I(1)–Pb(1) <sup>i</sup>                                                        | 94.68(3)   | Pb(1)–I(1)                | 3.1923(10)  |
| Pb(1)–I(2)–Pb(1) <sup>iV</sup>                                                       | 174.55(4)  | Pb(1)–I(2) <sup>i</sup>   | 3.2043(9)   |
| Pb(1)–I(3)–Pb(1) <sup>V</sup>                                                        | 150.69(4)  | Pb(1)–I(2)                | 3.22355(16) |
| I(1) <sup>i</sup> –Pb(1)–I(3) <sup>iii</sup>                                         | 175.92(3)  | Pb(1)–I(2) <sup>ii</sup>  | 3.22355(16) |
| I(1) <sup>i</sup> –Pb(1)–I(3)                                                        | 90.54(3)   | Pb(1)–I(3) <sup>iii</sup> | 3.2668(10)  |
| I(1)– Pb(1)–I(1) <sup>i</sup>                                                        | 85.33(3)   | Pb(1)–I(3)                | 3.2730(10)  |
| I(2) <sup>ii</sup> –Pb(1)–I(2)                                                       | 174.55(4)  |                           |             |
| I(1)–Pb(1)–I(3) <sup>iii</sup>                                                       | 90.60(3)   |                           |             |
| I(1)– Pb(1)–I(3)                                                                     | 175.86(3)  |                           |             |
| I(2)–Pb(1)–I(3) <sup>iii</sup>                                                       | 92.64(2)   |                           |             |
| I(2)–Pb(1)–I(3)                                                                      | 90.52(2)   |                           |             |
| I(1)–Pb(1)–I(2) <sup>ii</sup>                                                        | 89.29(2)   |                           |             |
| I(1)–Pb(1)–I(2)                                                                      | 89.29 (2)  |                           |             |
| I(2)–Pb(1)–I(3) <sup>iii</sup>                                                       | 92.64(2)   |                           |             |
| I(1) <sup>i</sup> –Pb(1)–I(2) <sup>ii</sup>                                          | 87.32(2)   |                           |             |
| I(1) <sup>i</sup> –Pb(1)–I(2)                                                        | 87.32(2)   |                           |             |
| I(3) <sup>iii</sup> –Pb(1)–I(3)                                                      | 93.542(13) |                           |             |



I(2)<sup>ii</sup>-Pb(1)-I(3) 90.52(2)  
 Symmetry codes:(i) 1-x,1-y,1-z; (ii)+x,+y,1+z; (iii) 1/2+x,1/2-y,+z; (iv) +x,+y, -1+z;  
 (v) -1/2+x,1/2-y, +z;

**(Mpd<sub>a</sub>)Pb<sub>2</sub>I<sub>6</sub>-298K**

|                                               |            |                           |            |
|-----------------------------------------------|------------|---------------------------|------------|
| I(2)-Pb(1)-I(2) <sup>i</sup>                  | 179.46(4)  | Pb(1)-I(2)                | 3.2374(2)  |
| I(3)-Pb(1)-I(2)                               | 90.256(19) | Pb(1)-I(2) <sup>i</sup>   | 3.2374(2)  |
| I(3) <sup>ii</sup> -Pb(1)-I(2)                | 90.06 (2)  | Pb(1)-I(3)                | 3.1823(10) |
| I(3) <sup>ii</sup> -Pb(1)-I(2) <sup>i</sup>   | 90.07(2)   | Pb(1)-I(3) <sup>ii</sup>  | 3.2068(12) |
| I(3)-Pb(1)-I(2) <sup>i</sup>                  | 90.256(19) | Pb(1)-I(1) <sup>iii</sup> | 3.1846(10) |
| I(3)- Pb(1)-I(3) <sup>ii</sup>                | 92.789(14) | Pb(1)-I(1)                | 3.2015(9)  |
| I(3)-Pb(1)-I(1)                               | 91.73(3)   |                           |            |
| I(3)-Pb(1)-I(1) <sup>iii</sup>                | 179.49(4)  |                           |            |
| I(1) <sup>iii</sup> - Pb(1)-I(2)              | 89.743(19) |                           |            |
| I(1) <sup>iii</sup> -Pb(1)-I(2) <sup>i</sup>  | 89.743(19) |                           |            |
| I(1)-Pb(1)-I(2)                               | 89.91(2)   |                           |            |
| I(1)-Pb(1)-I(2) <sup>i</sup>                  | 89.91(2)   |                           |            |
| I(1) <sup>iii</sup> -Pb(1)-I(3) <sup>ii</sup> | 87.72 (3)  |                           |            |
| I(1)-Pb(1)-I(3) <sup>ii</sup>                 | 175.48(3)  |                           |            |
| I(1)-Pb(1)-I(1) <sup>iii</sup>                | 87.76(3)   |                           |            |
| Pb(1)-I(2)-Pb(1) <sup>iv</sup>                | 179.46(4)  |                           |            |
| Pb(1)-I(3)-Pb(1) <sup>v</sup>                 | 151.34(5)  |                           |            |
| Pb(1)-I(1)-Pb(1) <sup>iii</sup>               | 92.24(3)   |                           |            |

Symmetry codes:(i)+x,+y,1+z; (ii) -1/2+x, 3/2-y,+z; (iii) 1-x, 1-y, 2-z; (iv) +x, +y,  
 -1+z; (v) 1/2+x,3/2-y, +z;

**(H<sub>2</sub>bd<sub>a</sub>)Pb<sub>2</sub>I<sub>6</sub>-298K**

|                                               |            |                            |           |
|-----------------------------------------------|------------|----------------------------|-----------|
| Pb(1) <sup>i</sup> -I(1)-Pb(1)                | 92.34 (2)  | Pb(1) <sup>i</sup> -I(1)   | 3.1222(8) |
| Pb(1) <sup>ii</sup> -I(2)-Pb(1)               | 149.27(3)  | Pb(1)-I(1)                 | 3.1899(9) |
| Pb(1)-I(3)-Pb(1) <sup>iii</sup>               | 176.34(4)  | Pb(1) <sup>ii</sup> -I(2)  | 3.1820(9) |
| I(1) <sup>i</sup> -Pb(1)-I(1)                 | 87.66(2)   | Pb(1)-I(2)                 | 3.2355(9) |
| I(1) <sup>i</sup> -Pb(1)-I(2)                 | 177.03(3)  | Pb(1)-I(3)                 | 3.2007(8) |
| I(1) <sup>i</sup> - Pb(1)-I(2) <sup>iv</sup>  | 87.10(2)   | Pb(1) <sup>iii</sup> -I(3) | 3.3092(8) |
| I(1) <sup>ii</sup> -Pb(1)-I(2)                | 89.52(2)   |                            |           |
| I(1)-Pb(1)-I(3) <sup>v</sup>                  | 87.19(2)   |                            |           |
| I(1)- Pb(1)-I(3)                              | 96.44(2)   |                            |           |
| I(1) <sup>ii</sup> -Pb(1)-I(3)                | 90.46 (2)  |                            |           |
| I(1) <sup>ii</sup> -Pb(1)-I(3) <sup>v</sup>   | 90.12(2)   |                            |           |
| I(2) <sup>iv</sup> -Pb(1)-I(1)                | 170.62(2)  |                            |           |
| I(2) <sup>iv</sup> -Pb(1)-I(2)                | 95.823(15) |                            |           |
| I(2) <sup>iv</sup> -Pb(1)-I(3) <sup>iii</sup> | 85.04(2)   |                            |           |
| I(2) <sup>iv</sup> -Pb(1)-I(3) <sup>ii</sup>  | 91.37(3)   |                            |           |
| I(2)-Pb(1)-I(3) <sup>v</sup>                  | 90.67(2)   |                            |           |

|                                                                                                                  |           |
|------------------------------------------------------------------------------------------------------------------|-----------|
| I(3)–Pb(1)–I(2)                                                                                                  | 88.94(2)  |
| I(3)–Pb(1)–I(3) <sup>v</sup>                                                                                     | 176.34(4) |
| Symmetry codes:(i) 1–x,1–y,2–z; (ii) +x, 1/2–y, –1/2+z; (iii) 1+x,+y,+z; (iv) +x, 1/2–y, 1/2+z; (v) –1+x, +y, +z |           |

---

**Table S4.** Survey of intra-octahedral distortions in (M<sub>2</sub>pda)Pb<sub>2</sub>I<sub>6</sub>.

| Distortions parameters                                   | Intraoctahedral distortions |                       |
|----------------------------------------------------------|-----------------------------|-----------------------|
|                                                          | $\Delta d (\times 10^{-4})$ | $\sigma^2 (^\circ^2)$ |
| (M <sub>2</sub> pda)Pb <sub>2</sub> I <sub>6</sub> (LTP) | 6.1                         | 7.3                   |
| (M <sub>2</sub> pda)Pb <sub>2</sub> I <sub>6</sub> (HTP) | 0.9                         | 5.9                   |

Note (see Fig. S7):

Intraoctahedral distortions within a single PbI<sub>6</sub> octahedron are quantified by bond length distortion  $\Delta d$ :

$$\Delta d = \left(\frac{1}{6}\right) \sum \frac{(d_i - d_o)^2}{d_o^2}$$

where  $d_i$  denotes the six Pb–I bond lengths and  $d_o$  is the mean Pb–I bond length, and bond angle variance  $\sigma^2$ :

$$\sigma^2 = \left(\frac{1}{11}\right) \sum_{i=1}^{12} (\theta_i - 90)^2$$

where  $\theta_i$  denotes the individual I–Pb–I bond angles.

**Table S5.** Structure optimization for DFT calculation.

|                                                    |     | <i>a</i> | <i>b</i> | <i>c</i> | $\beta$ | <i>volume</i> | Err%  |
|----------------------------------------------------|-----|----------|----------|----------|---------|---------------|-------|
| (M <sub>2</sub> pda)Pb <sub>2</sub> I <sub>6</sub> | exp | 9.13480  | 17.66630 | 6.42660  | 90      | 1037.112590   |       |
|                                                    | PBE | 9.24881  | 17.22519 | 6.37258  | 90      | 1015.231737   | –2.11 |
